# Supplementary material
Source: publisher site journal article supplement (https://www.spandidos-publications.com/7770/downloadSupplementary)

Figure S1. Flow cytometric analysis of apoptosis in the hsa\_circ\_0122913-knockdown BMSC group at 48, 72 h and 7 days. BMSC, bone marrow mesenchymal stem cell.

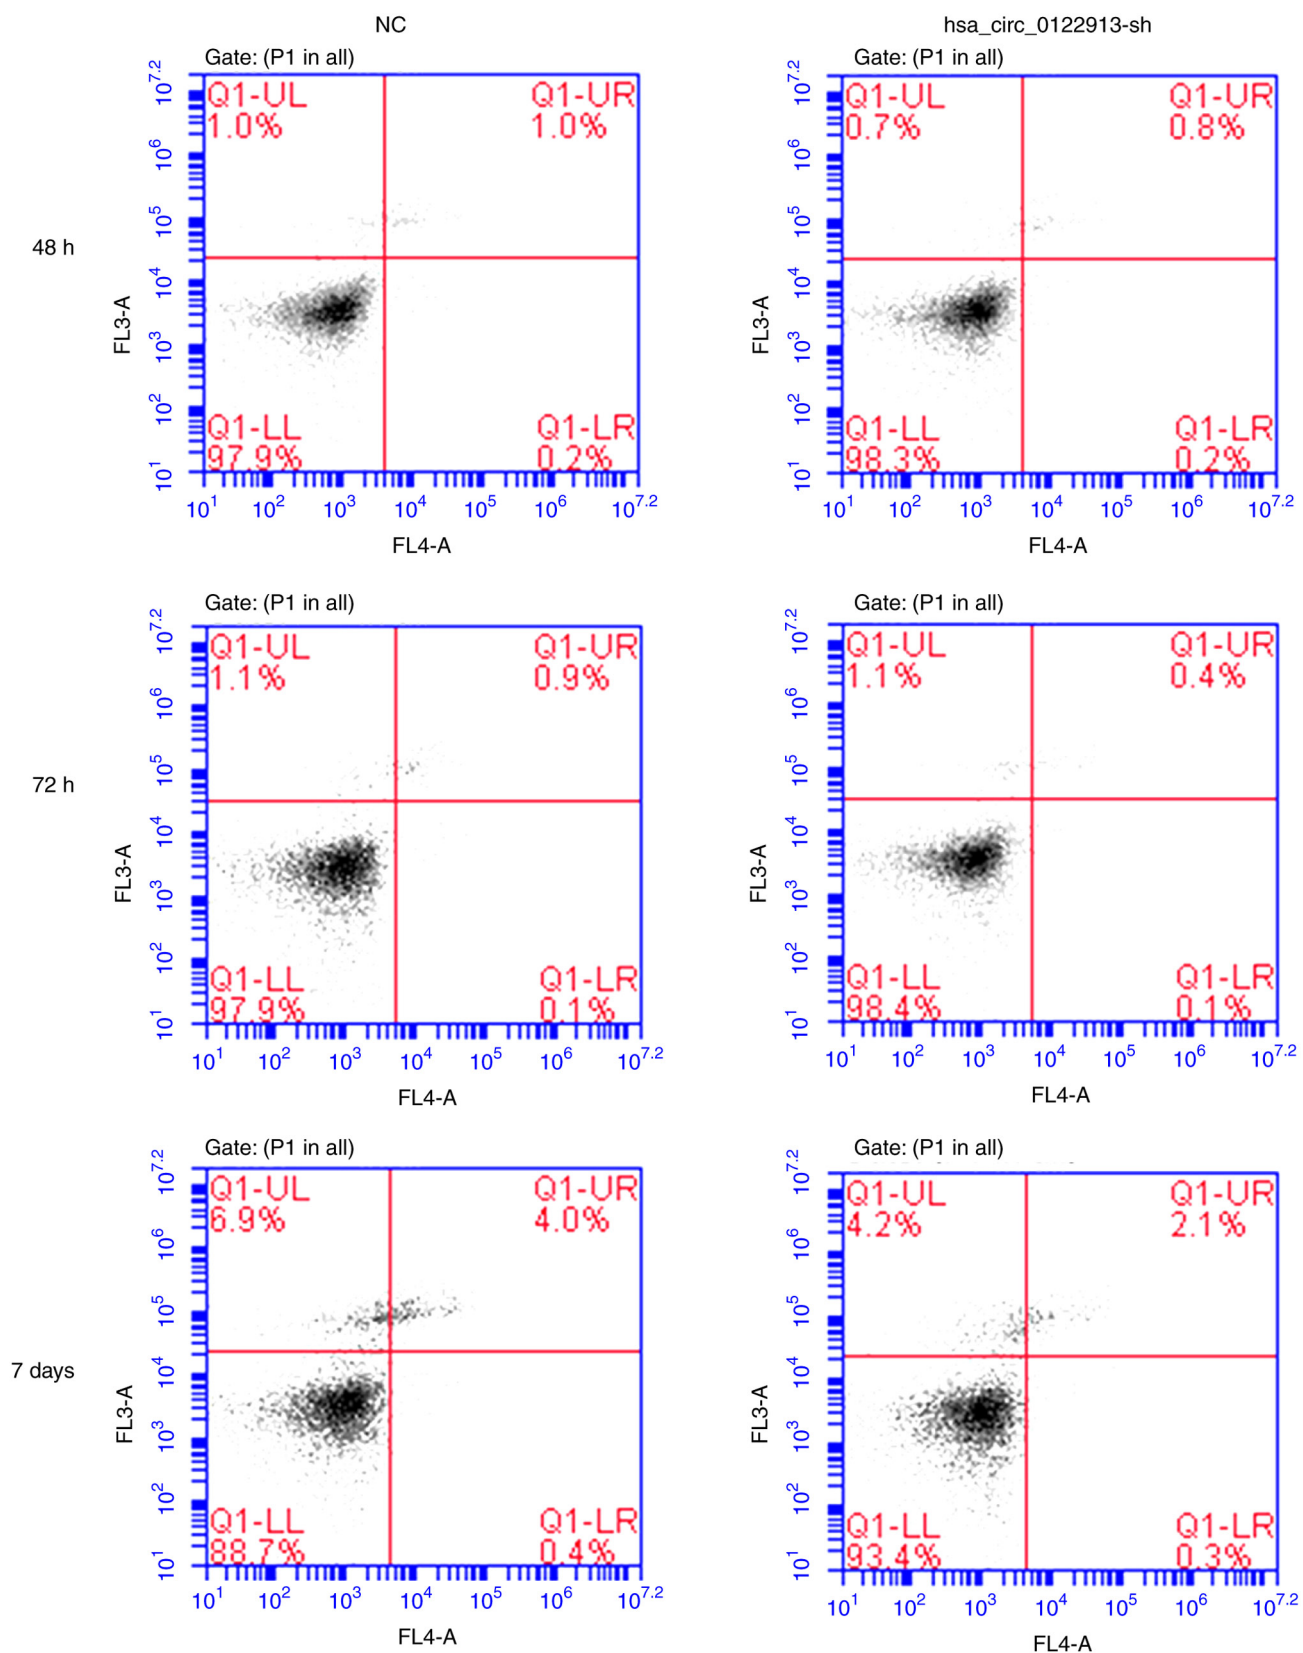

Supplement: Supplementary file 1 [file downloadSupplementary]
